# Supplementary material
Source: PubMed Central journal article supplement (PMC9057949)
Supplement: mmc4.pdf [file mmc4.pdf]

**Patient recruitment**  
Patients admitted to a private practice with a positive test for SARS-CoV-2 within the last 72 hours

**Allocation to test group**  
n = 18 patients

**Allocation to placebo group**  
n = 6 patients

**Acquirement of baseline oropharyngeal specimens**  
n = 18 patients

**Acquirement of baseline oropharyngeal specimens**  
n = 6 patients

**Mouthrinse with 0.1% BAC**  
n = 18 patients

**Mouthrinse with 0.9% NaCl**  
n = 6 patients

**Acquirement of oropharyngeal specimens 15 min after mouthrinse**  
n = 18 patients

**Acquirement of oropharyngeal specimens 15 min after mouthrinse**  
n = 6 patients

**Acquirement of oropharyngeal specimens 30 min after mouthrinse**  
n = 18 patients

**Acquirement of oropharyngeal specimens 30 min after mouthrinse**  
n = 6 patients

**Analysis of oropharyngeal specimens:**

- RT-qPCR-based analysis of viral load
- Antigen point-of-care tests
- Virus rescue in cell culture
